# Supplementary material for: Genome Sequence of Kitasatospora setae NBRC 14216T: An Evolutionary Snapshot of the Family Streptomycetaceae
Source: PubMed Central journal article supplement — DNA Res. 2010 Nov 8;17(6):393–406. doi: 10.1093/dnares/dsq026 (PMC2993542; doi:10.1093/dnares/dsq026), 2010-11-08
Supplement: supp_dsq026_dsq026supp.pdf [file supp_dsq026_dsq026supp.pdf]

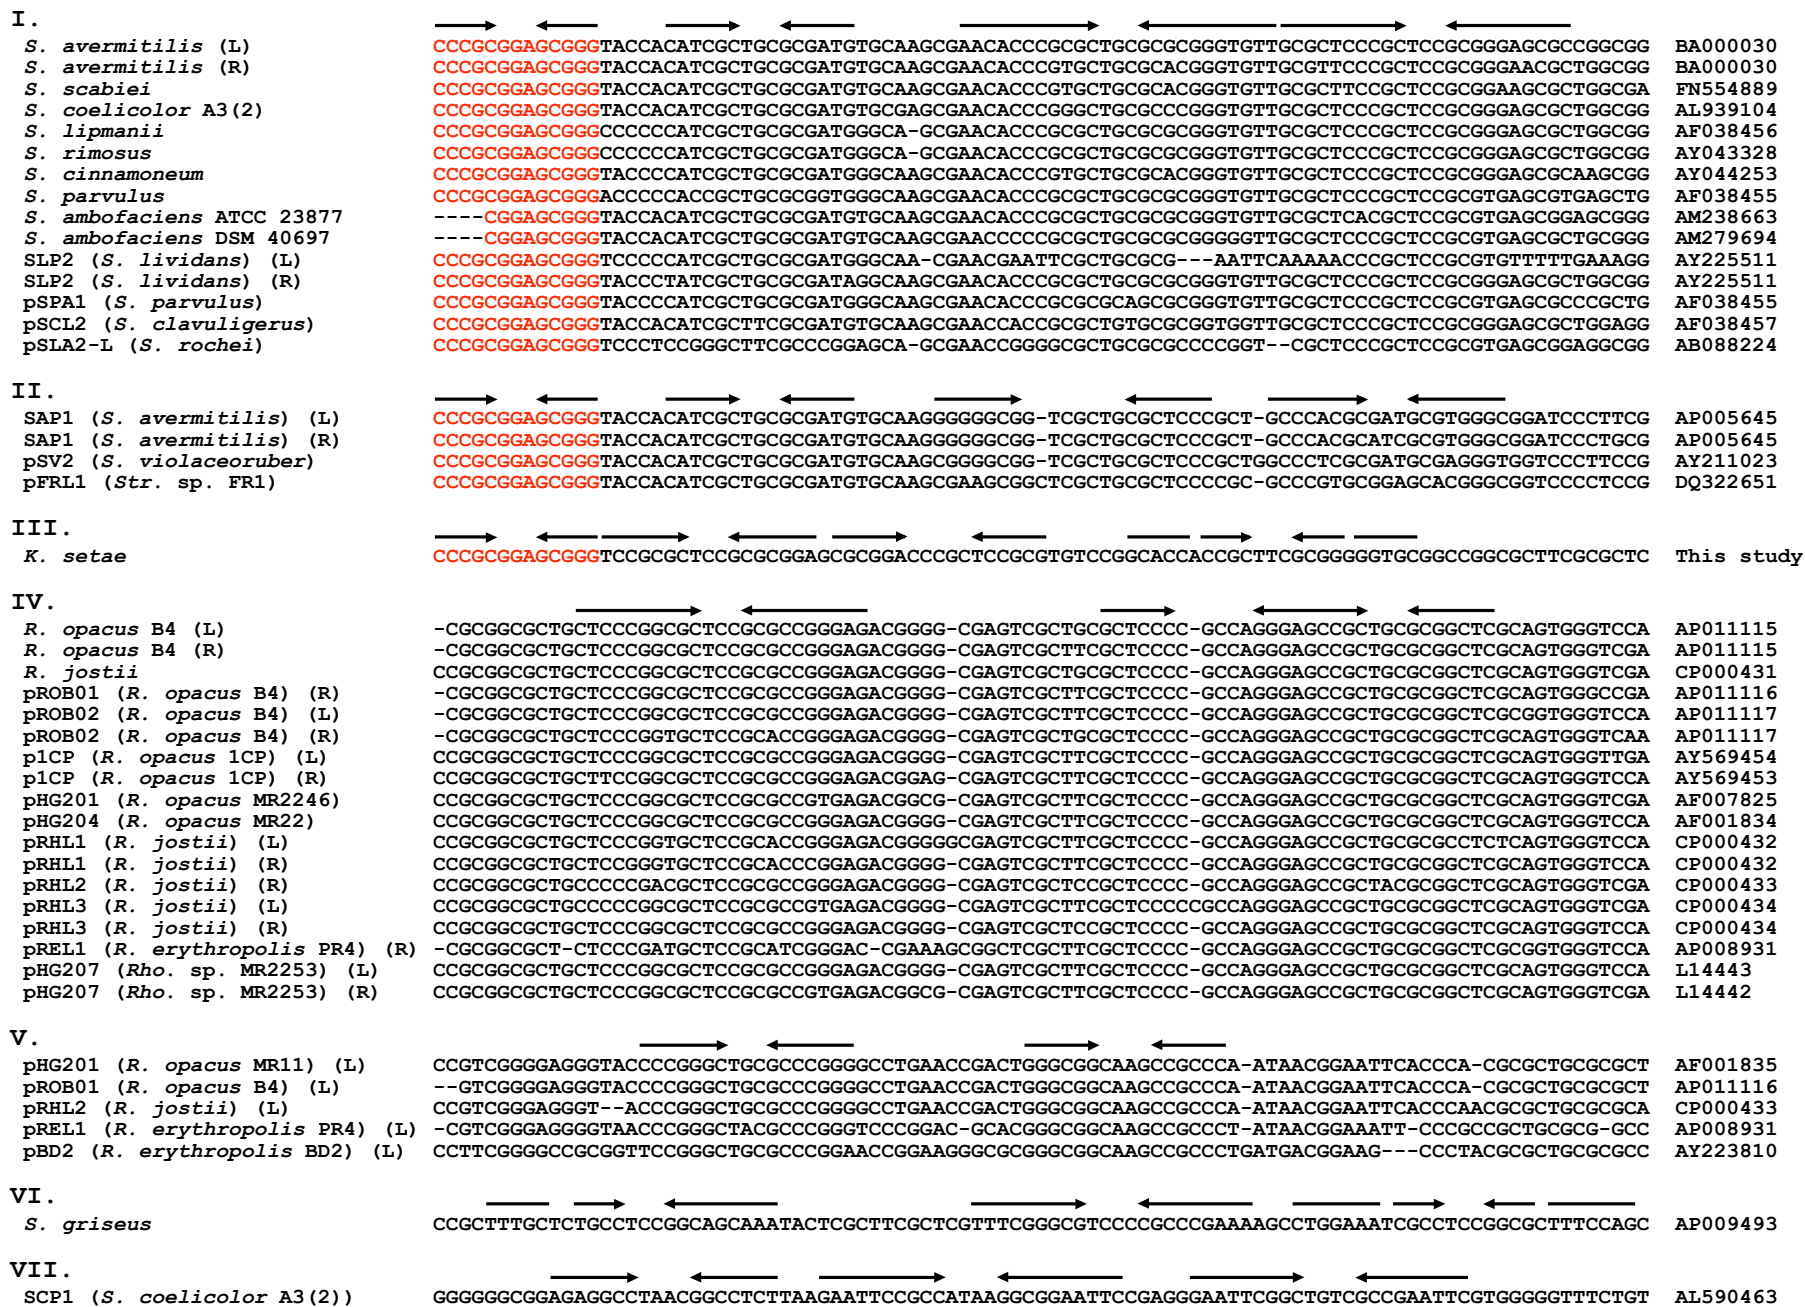

Fig. S1

Comparison of terminal sequences of linear chromosomes and plasmids. Palindrome structures are indicated by arrows. The first 13 bp conserved in group I to III are colored red. Sequences were retrieved from GenBank with accession numbers shown at right.

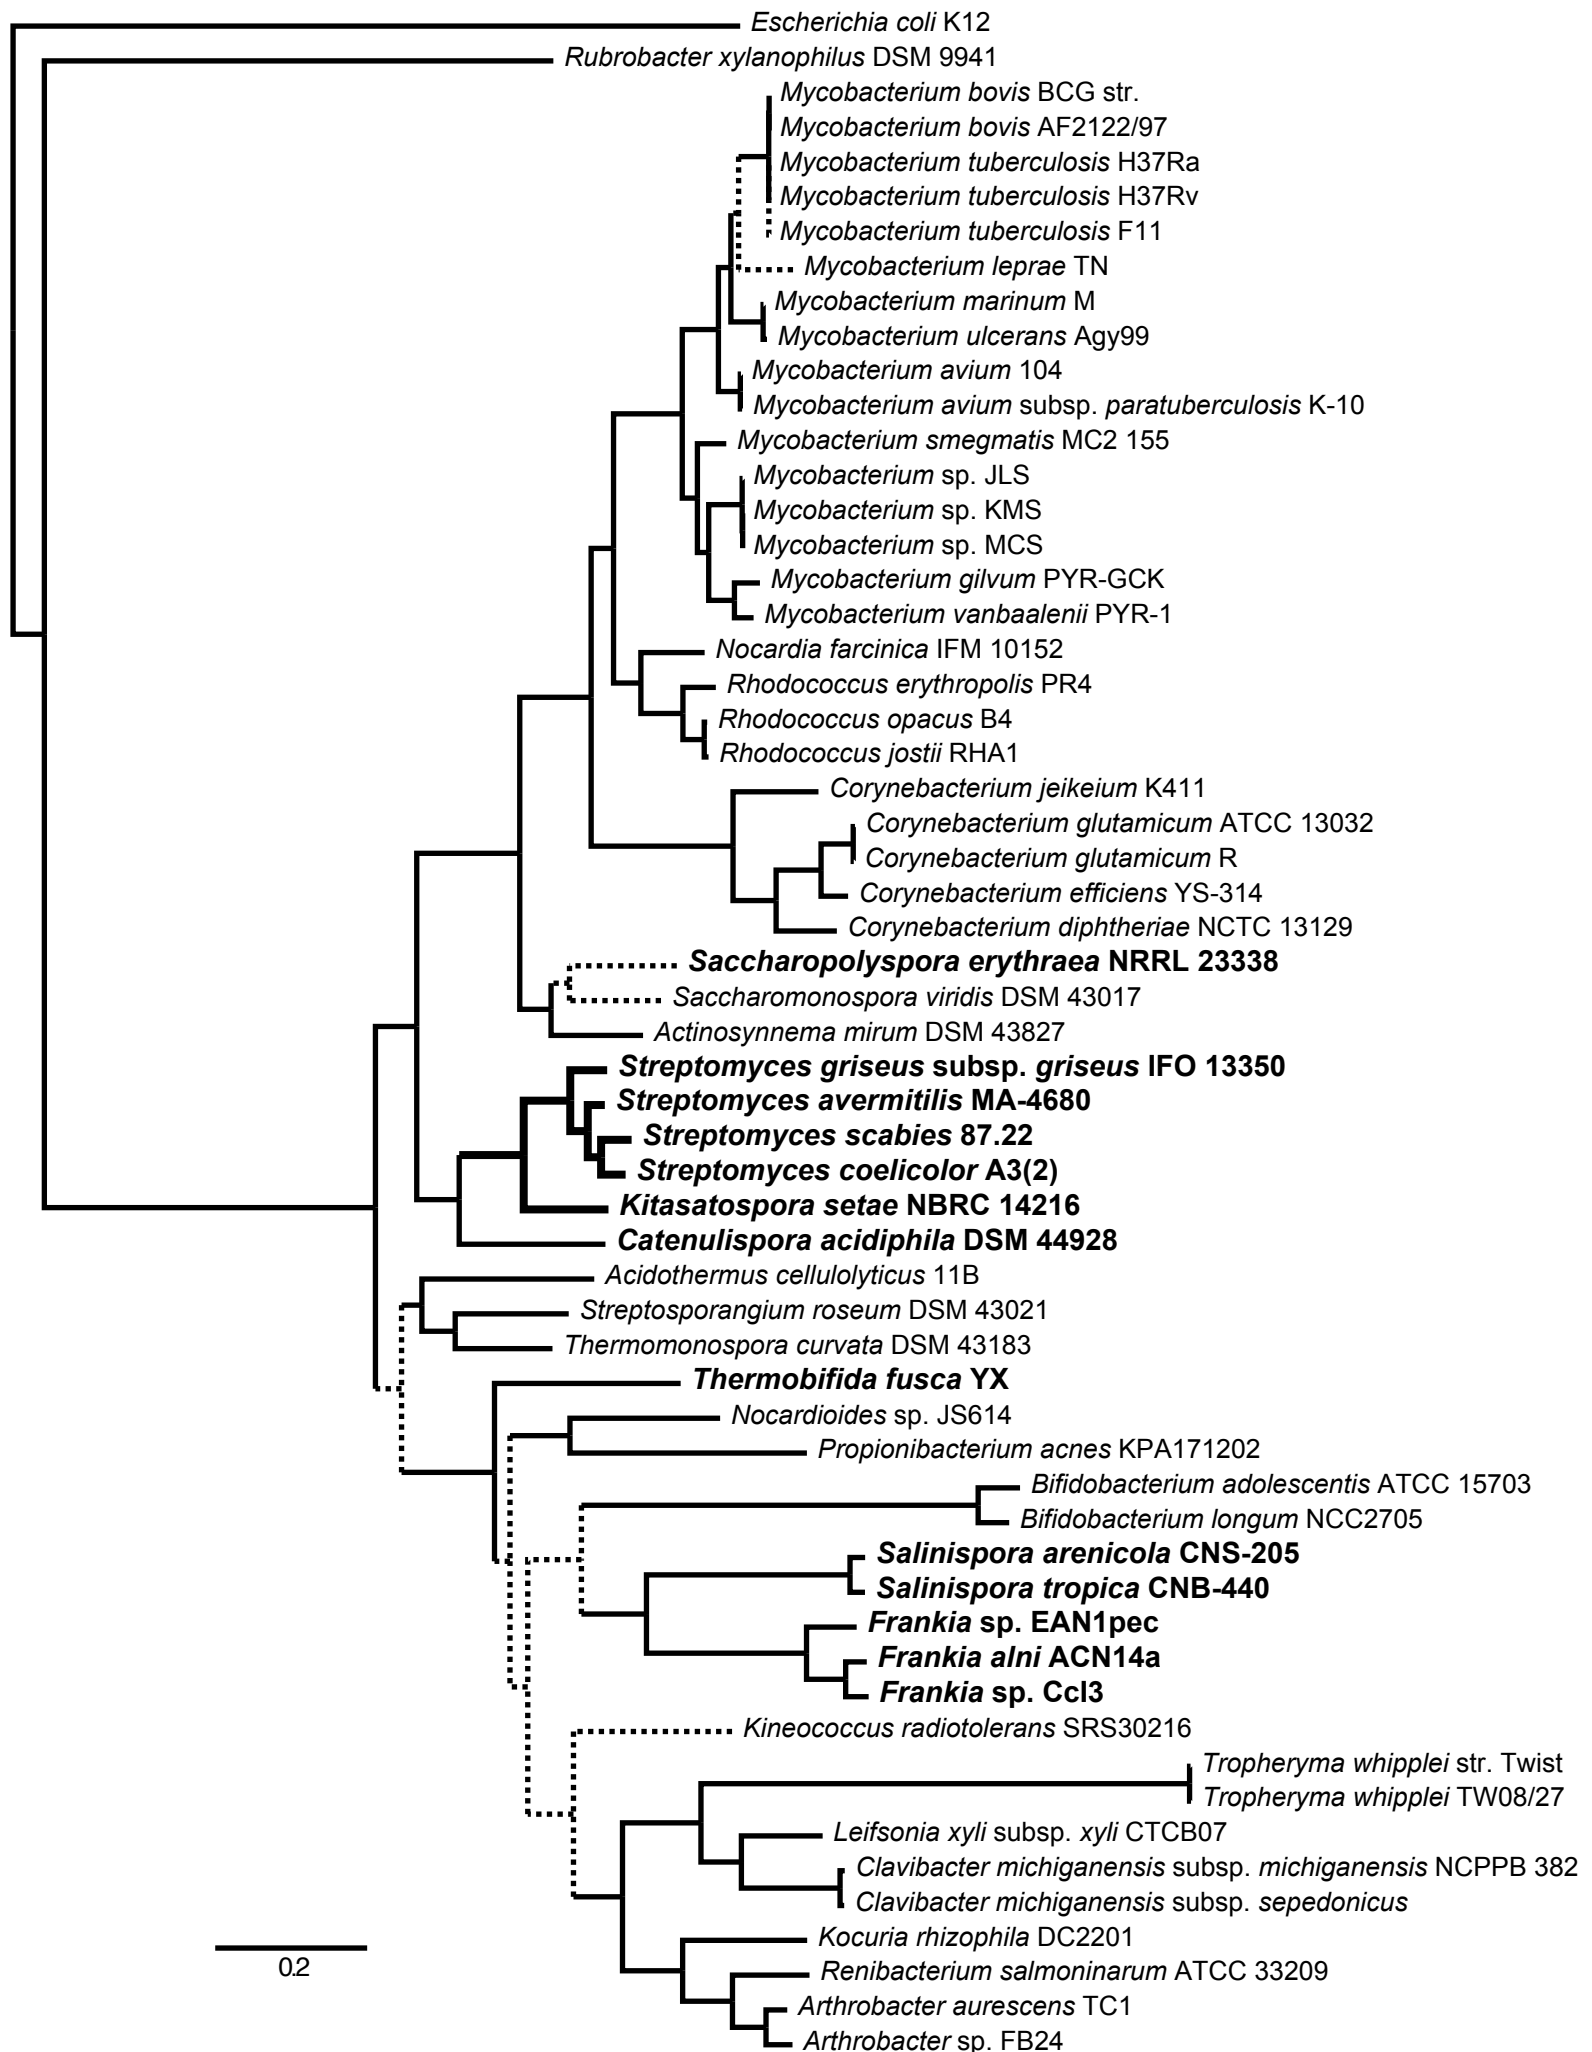

Fig. S2

Phylogenetic tree based upon amino acid sequences of 31 protein-coding genes analyzed by Maximum-likelihood method. Branches with less than 90% bootstrap support are represented in dashed lines. Lists of organisms and genes used for the analysis are shown in supplementary materials Table S1 and S2, respectively. Names of the organisms mentioned in the text are shown in bold type.

Table S1. List of species used in multi-locus phylogenetic tree analysis

---

| <b>Species</b>                                                         |
|------------------------------------------------------------------------|
| <i>Acidothermus cellulolyticus</i> 11B                                 |
| <i>Actinosynnema mirum</i> DSM 43827                                   |
| <i>Arthrobacter aurescens</i> TC1                                      |
| <i>Arthrobacter</i> sp. FB24                                           |
| <i>Bifidobacterium adolescentis</i> ATCC 15703                         |
| <i>Bifidobacterium longum</i> NCC2705                                  |
| <i>Catenulispora acidiphila</i> DSM 44928                              |
| <i>Clavibacter michiganensis</i> subsp. <i>michiganensis</i> NCPPB 382 |
| <i>Clavibacter michiganensis</i> subsp. <i>sepedonicus</i>             |
| <i>Corynebacterium diphtheriae</i> NCTC 13129                          |
| <i>Corynebacterium efficiens</i> YS-314                                |
| <i>Corynebacterium glutamicum</i> R                                    |
| <i>Corynebacterium glutamicum</i> ATCC 13032                           |
| <i>Corynebacterium jeikeium</i> K411                                   |
| <i>Escherichia coli</i> K12 (outgroup)                                 |
| <i>Frankia alni</i> ACN14a                                             |
| <i>Frankia</i> sp. Ccl3                                                |
| <i>Frankia</i> sp. EAN1pec                                             |
| <i>Kineococcus radiotolerans</i> SRS30216                              |
| <i>Kocuria rhizophila</i> DC2201                                       |
| <i>Kitasatospora setae</i> NBRC 14216                                  |
| <i>Leifsonia xyli</i> subsp. <i>xyli</i> CTCB07                        |
| <i>Mycobacterium avium</i> 104                                         |
| <i>Mycobacterium bovis</i> AF2122/97                                   |
| <i>Mycobacterium bovis</i> BCG str.                                    |
| <i>Mycobacterium gilvum</i> PYR-GCK                                    |
| <i>Mycobacterium leprae</i> TN                                         |
| <i>Mycobacterium marinum</i> M                                         |
| <i>Mycobacterium avium</i> subsp. <i>paratuberculosis</i> K-10         |
| <i>Mycobacterium smegmatis</i> MC2 155                                 |
| <i>Mycobacterium</i> sp. JLS                                           |
| <i>Mycobacterium</i> sp. KMS                                           |
| <i>Mycobacterium</i> sp. MCS                                           |

*Mycobacterium tuberculosis* H37Ra  
*Mycobacterium tuberculosis* F11  
*Mycobacterium tuberculosis* H37Rv  
*Mycobacterium ulcerans* Agy99  
*Mycobacterium vanbaalenii* PYR-1  
*Nocardia farcinica* IFM 10152  
*Nocardioides* sp. JS614  
*Propionibacterium acnes* KPA171202  
*Renibacterium salmoninarum* ATCC 33209  
*Rhodococcus erythropolis* PR4  
*Rhodococcus opacus* B4  
*Rhodococcus jostii* RHA1  
*Rubrobacter xylanophilus* DSM 9941  
*Saccharopolyspora erythraea* NRRL 23338  
*Saccharomonospora viridis* DSM 43017  
*Salinispora arenicola* CNS-205  
*Salinispora tropica* CNB-440  
*Streptomyces avermitilis* MA-4680  
*Streptomyces coelicolor* A3(2)  
*Streptomyces griseus* subsp. *griseus* IFO 13350  
*Streptosporangium roseum* DSM 43021  
*Streptomyces scabies* 87.22  
*Thermomonospora curvata* DSM 43183  
*Thermobifida fusca* YX  
*Tropheryma whipplei* TW08/27  
*Tropheryma whipplei* str. Twist

---

Table S2. Conserved amino-acid sequences used in multi-locus phylogenetic analysis.

| <b>annotation</b>                                          | <b>COG_ID</b> | <b>HAMAP_ID</b>   |
|------------------------------------------------------------|---------------|-------------------|
| Predicted GTPase, probable translation factor              | COG0012       | -                 |
| Phenylalanyl-tRNA synthetase alpha subunit                 | COG0016       | MF_00281          |
| Ribosomal protein S12                                      | COG0048       | MF_00403          |
| Ribosomal protein S7                                       | COG0049       | MF_00480          |
| Ribosomal protein S2                                       | COG0052       | MF_00291          |
| Ribosomal protein L11                                      | COG0080       | MF_00736          |
| Ribosomal protein L1                                       | COG0081       | MF_01318          |
| Ribosomal protein L3                                       | COG0087       | MF_01325          |
| Ribosomal protein L22                                      | COG0091       | MF_01331          |
| Ribosomal protein S3                                       | COG0092       | MF_01309          |
| Ribosomal protein L14                                      | COG0093       | MF_01367          |
| Ribosomal protein L5                                       | COG0094       | MF_01333          |
| Ribosomal protein S8                                       | COG0096       | MF_01302          |
| Ribosomal protein L6P/L9E                                  | COG0097       | MF_01365          |
| Ribosomal protein S5                                       | COG0098       | MF_01307          |
| Ribosomal protein S13                                      | COG0099       | MF_01315          |
| Ribosomal protein S11                                      | COG0100       | MF_01310          |
| Ribosomal protein L13                                      | COG0102       | MF_01366          |
| Ribosomal protein S9                                       | COG0103       | MF_00532          |
| Seryl-tRNA synthetase                                      | COG0172       | MF_00176          |
| Ribosomal protein S15P/S13E                                | COG0184       | MF_01343          |
| Ribosomal protein S17                                      | COG0186       | MF_01345          |
| Ribosomal protein L16/L10E                                 | COG0197       | MF_01342          |
| Ribosomal protein L15                                      | COG0200       | MF_01341          |
| Preprotein translocase subunit SecY                        | COG0201       | -                 |
| DNA-directed RNA polymerase, alpha subunit/40 kD subunit   | COG0202       | MF_00059          |
| Ribosomal protein L18                                      | COG0256       | MF_01337          |
| Leucyl-tRNA synthetase                                     | COG0495       | MF_00049          |
| Ribosomal protein S4 and related proteins                  | COG0522       | MF_01306          |
| Valyl-tRNA synthetase                                      | COG0525       | MF_02004/MF_02005 |
| Metal-dependent proteases with possible chaperone activity | COG0533       | MF_01445          |

Table S3. Paralogous genes involved in morphological differentiation found in *K. setae* and *Streptomyces* genomes.

|                                 | <i>K. setae</i>                                                            | <i>S. coelicolor</i> A3(2)       | <i>S. avermitilis</i> | <i>S. griseus</i>                  | <i>S. scabies</i>      |
|---------------------------------|----------------------------------------------------------------------------|----------------------------------|-----------------------|------------------------------------|------------------------|
| <b>chaplins/rodmins</b>         |                                                                            |                                  |                       |                                    |                        |
| ChpA                            | KSE_04530<br>KSE_66200                                                     | SCO2716                          | -                     | SGR_5829                           | -                      |
| ChpB                            | KSE_66190                                                                  | SCO7257                          | SAV_1230              | -                                  | -                      |
| ChpC                            | KSE_33530                                                                  | SCO1674                          | SAV_6636              | -                                  | SCAB73031              |
| ChpD                            | KSE_22520                                                                  | SCO2717                          | -                     | SGR_1375                           | SCAB59021              |
| ChpE                            | KSE_22510                                                                  | SCO1800                          | SAV_6478              | SGR_5696                           | SCAB71491              |
| ChpF                            | -                                                                          | SCO2705                          | -                     | -                                  | -                      |
| ChpG                            | -                                                                          | SCO2699                          | -                     | SGR_526                            | SCAB59251              |
| ChpH                            | -                                                                          | SCO1675                          | SAV_6635              | SGR_5828                           | -                      |
| RdlA                            | KSE_33570                                                                  | SCO2718                          | -                     | SGR_1371                           | -                      |
| RdlB                            | KSE_22560                                                                  | SCO2719                          | -                     | SGR_1376                           | SCAB58991              |
| <b>SsgA-like protein family</b> |                                                                            |                                  |                       |                                    |                        |
| SsgA                            | KSE_39770<br>KSE_12250                                                     | SCO3926                          | SAV_4267              | SGR_3655                           | SCAB46311              |
| SsgB                            | KSE_14600                                                                  | SCO1541                          | SAV_6810              | SGR_5997                           | SCAB74621              |
| SsgD                            | KSE_28620                                                                  | SCO6722                          | SAV_1687              | SGR_1004                           | SCAB13431              |
| SsgE                            | -                                                                          | SCO3158                          | SAV_3605              | SGR_4320                           | SCAB53351              |
| SsgG                            | KSE_28490<br>KSE_11930                                                     | SCO2924                          | -                     | SGR_4615                           | SCAB56401              |
| Ssg others                      | KSE_01860<br>KSE_05120<br>KSE_06570<br>KSE_55820<br>KSE_60010<br>KSE_68960 | SCO7289 (SsgC)<br>SCO7175 (SsgF) | SAV_570<br>SAV_580    | SGR_128<br>SGR_41t<br>(=SGR_7098t) | SCAB62371<br>SCAB85011 |
| <b>WhiB family protein</b>      |                                                                            |                                  |                       |                                    |                        |
| WhiB                            | KSE_29410                                                                  | SCO3034                          | SAV_5042              | SGR_4503                           | SCAB55081              |
| WblA                            | KSE_36420                                                                  | SCO3579                          | SAV_4584              | SGR_3340                           | SCAB41391              |
| WblB                            | KSE_31070                                                                  | SCO4767                          | SAV_4997              | SGR_2760                           | SCAB36241              |
| WblC                            | KSE_48970                                                                  | SCO5190                          | SAV_3070              | SGR_2335                           | SCAB30701              |
| WblE                            | KSE_49420                                                                  | SCO5240                          | SAV_3016              | SGR_2274                           | SCAB30131              |
| WblE2                           | KSE_74490                                                                  | SCO7306                          | -                     | SGR_6595                           | -                      |
| WblI                            | KSE_47820                                                                  | SCO5046                          | SAV_3216              | SGR_2479                           | SCAB33531              |
| WblH                            | -                                                                          | SCO6715                          | SAV_1693              | -                                  | SCAB13481              |
| Other                           | KSE_05050<br>KSE_68910                                                     | -                                | SAV_7514              | SGR_1009                           | SCAB12431              |

<sup>a</sup> SGR\_41t gene was embedded in terminal inverted repeat and identical to SGR\_7098t.
